# Supplementary material
Source: HighWire-hosted journal article supplement (https://ez-admanager.com/highwire/filestream/161055/field_highwire_adjunct_files/0/Pettersen_1077.pdf)
Supplement: Pettersen_1077.pdf [file Pettersen_1077.pdf]

# 急性低血圧によるCADASILの急速な悪化 白質希薄化に対する動脈と静脈の寄与

CADASIL accelerated by acute hypotension  
Arterial and venous contribution to leukoaraiosis

Jacqueline A. Pettersen, MD\*;  
Julia Keith, MD;  
Fuqiang Gao, MD;  
J. David Spence, MD;  
Sandra E. Black, MD

\*Northern Medical Program  
and Division of Neurology,  
Department of Medicine,  
University of British  
Columbia, Vancouver,  
Canada

Correspondence to Dr. Pettersen:  
pettersj@unbc.ca

**目的：**皮質下梗塞と白質脳症を伴う常染色体優性脳動脈症 (CADASIL) における血圧調節の重要性を強調し、本疾患で静脈に起こる変化、特に白質希薄化に伴う静脈性膠原線維症 (venous collagenosis) について述べる。

**方法：**神経画像および病理データを用いた症例報告。

**結果：**遺伝子診断でCADASILが確認された61歳の男性は、自動車事故後、当初は意識清明であったが、その後、大腿骨開放骨折による血圧の低下 (60/40 mmHg) があり、気管内挿管が必要となった。脳画像検査で新たな白質梗塞巣が多数認められた。数日後に2度目の低血圧エピソードが生じ、これに伴い、両側の放線冠と小脳脚に硬貨大の新たな梗塞巣がみられ、四肢麻痺となった。塞栓源は心臓や血管系の画像検査で認められなかった。患者は外傷後5週間で死亡した。剖検では、皮質下および脳室周囲の広範囲にわたる白質脳症と、皮質下深部の灰白質と白質における多数の空洞 (cavitation) が認められた。小動脈は血管壁が肥厚し、筋層の断裂があり、内膜に過ヨウ素酸シッフ (PAS) 染色陽性物質がみられた。大きな脳室周囲の静脈および内径の小さな静脈でも血管壁が肥厚していたが、PAS染色陰性およびトリクローム染色陽性であり、静脈性膠原線維症に一致していた。全領域性の低酸素症 (global hypoxia) やびまん性軸索損傷の病理学的な証拠は認められなかった。

**結論：**これらの所見から、血管反応性が低下している状態における急性低血圧により、CADASILが急速に悪化したことが示唆される。また、白質病変部で静脈の膠原線維症がみられており、見落とされがちであるが、静脈は白質構造の維持に重要な役割を果たすことが示唆される。

*Neurology*® 2017; 88: 1077-1080

※本症例報告は、代理人である患者の妻よりインフォームド・コンセントを取得している。

図1 低血圧エピソード後のMRI所見

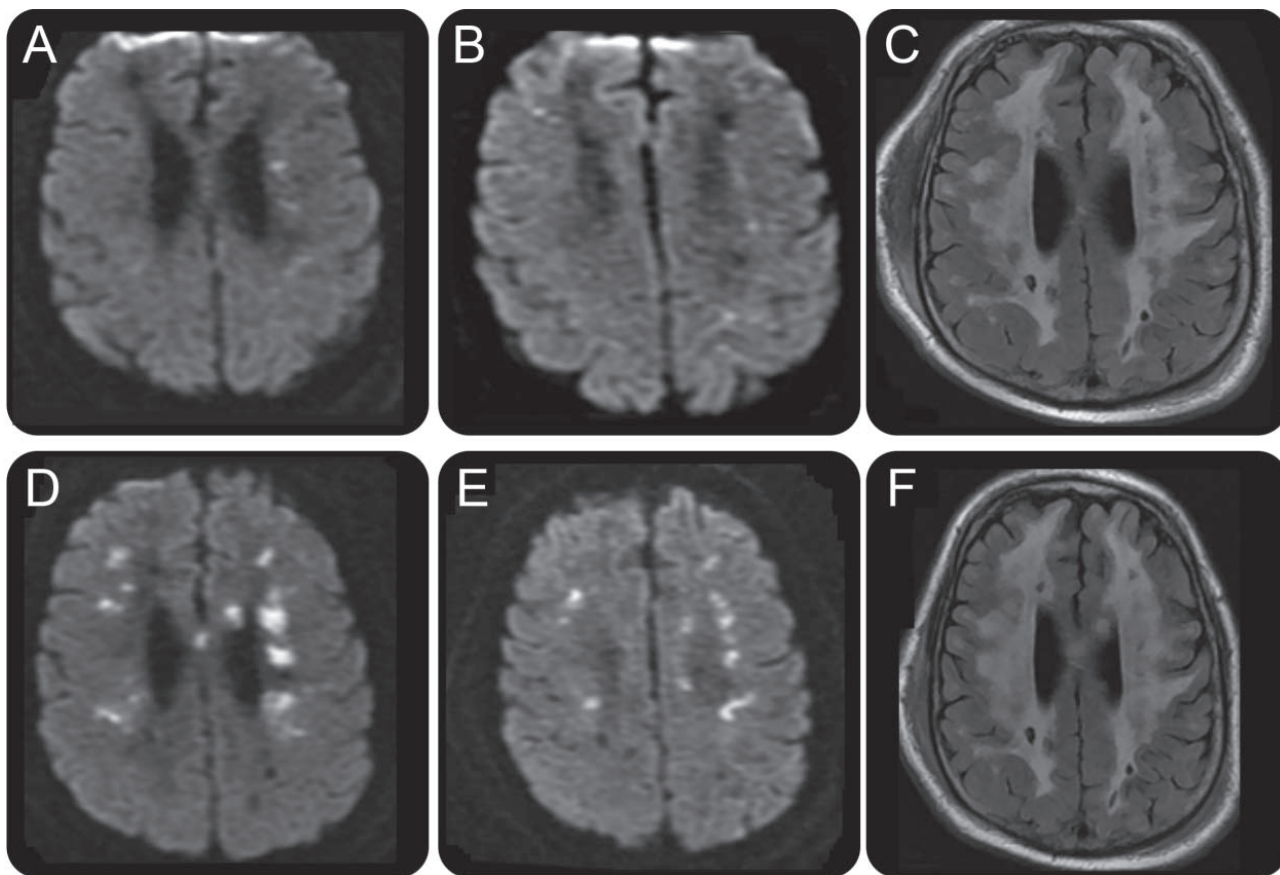

MRIの体軸断面像において、慢性梗塞を背景とする急性梗塞 (acute-on-chronic infarcts) が多数みられる。最初の低血圧エピソード後の拡散強調画像法 (DWI) の画像 (A, B) とfluid-attenuated inversion recovery (FLAIR) の画像 (C)。数日後の2度目の低血圧エピソード後におけるDWIの画像 (D, E) とFLAIRの画像 (F)。
